# Supplementary material for: How reliably can we predict the reliability of protein structure predictions?
Source: Springer Nature journal article supplement (doi:10.1186/1471-2105-9-137), 2008-03-03

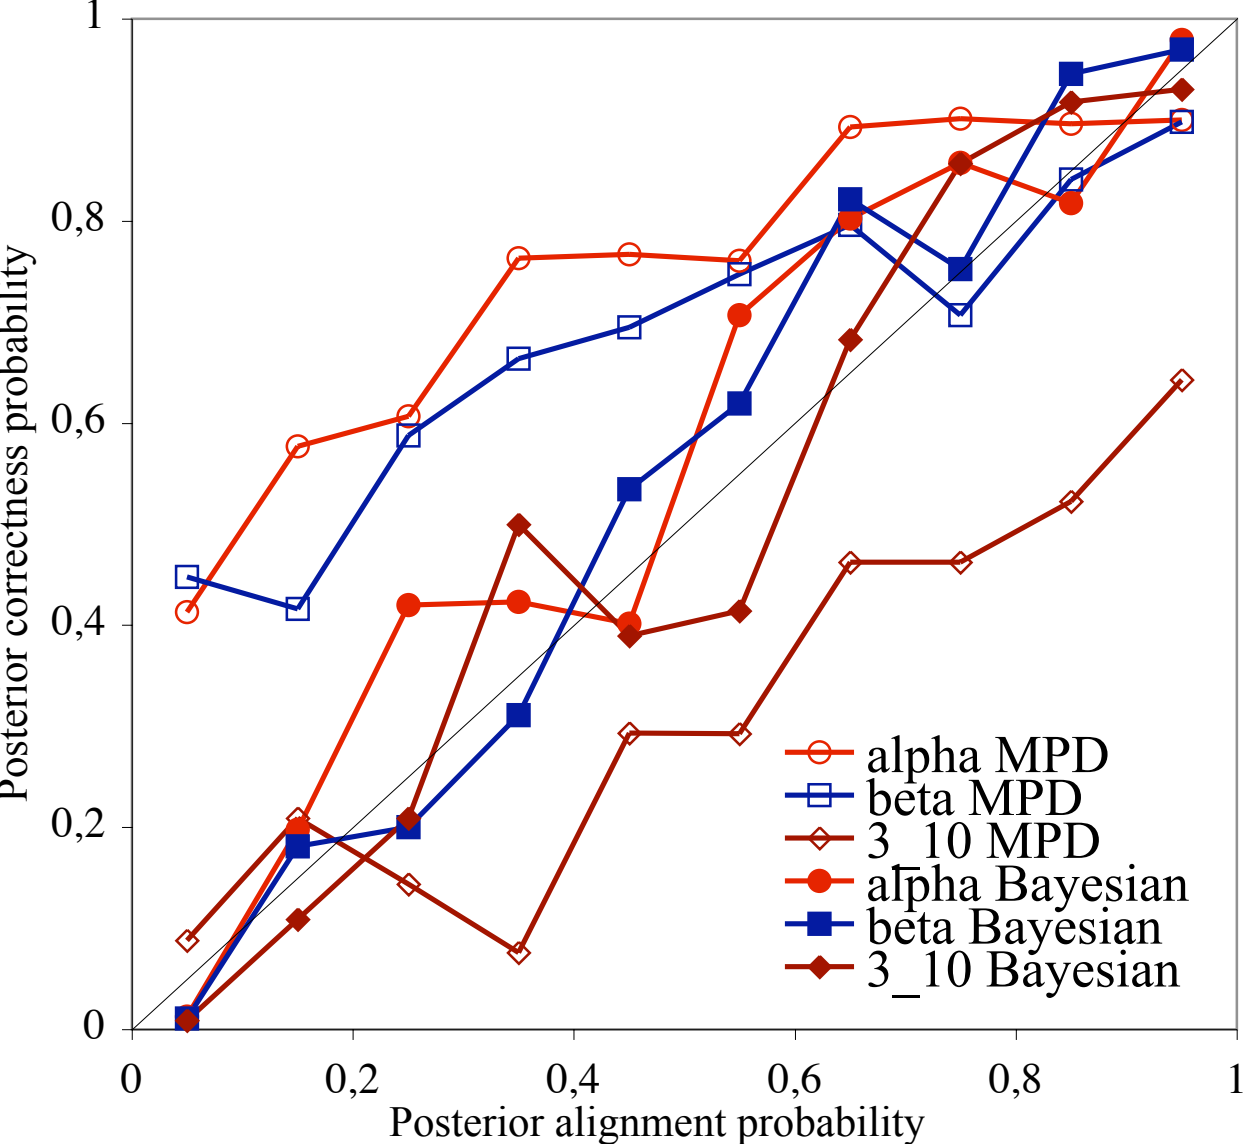

Supplement: 12859_2007_2122_MOESM4_ESM.pdf [file 12859_2007_2122_MOESM4_ESM.pdf]
